# Supplementary material for: BnHO1, a haem oxygenase-1 gene from Brassica napus, is required for salinity and osmotic stress-induced lateral root formation
Source: PubMed Central journal article supplement — J Exp Bot. 2011 Jun 14;62(13):4675–89. doi: 10.1093/jxb/err190 (PMC3170560; doi:10.1093/jxb/err190), 2011-06-14
Supplement: supp_err190_00061689_file001.pdf [file supp_err190_00061689_file001.pdf]

BnHO1, a haem oxygenase-1 gene from *Brassica napus*, is required for salinity and osmotic stress-induced lateral root formation. Zeyu Cao, Beibei Geng, Sheng Xu, Wei Xuan, Li Nie, Wenbiao Shen, Yongchao Liang and Rongzhan Guan

## SUPPLEMENTARY DATA

### Supplementary materials and methods

#### *Modelling the structure of BnHO1*

Secondary structure of mBnHO1 protein were predicted by PSIPRED software (<http://bioinf.cs.ucl.ac.uk/psipred>), and a three-dimensional structure of rapeseed HO was produced on the basis of the alignment of its amino acid sequence (minus the N-terminal transit sequence) according to the methods described by Linley et al (2006) with little modification. Homology model of mBnHO1 tertiary structure was predicted by the SWISS-MODEL software using the structural co-ordinates of human HO-1 (Schuller *et al.*, 1999) and rat HO-1 (Sugishima *et al.*, 2000). SWISS-MODEL Workspace is a web-based integrated service dedicated to protein structure homology modelling (Peitsch, 1995; Arnold *et al.*, 2006; Kiefer *et al.*, 2009), comprising protein structure modelling by satisfaction of spatial restraints derived from known structures with similar sequences to the target molecule.

### References

- Arnold K, Bordoli L, Kopp J, Schwede T.** 2006. The SWISS-MODEL Workspace: A web-based environment for protein structure homology modelling. *Bioinformatics* **22**, 195–201.
- Kiefer F, Arnold K, Künzli M, Bordoli L, Schwede T.** 2009. The SWISS-MODEL Repository and associated resources. *Nucleic Acids Research* **37**, D387–D392.
- Linley PJ, Landsberger M, Kohchi T, Cooper JB, Terry MJ.** 2006. The molecular basis of heme oxygenase deficiency in the pcd1 mutant of pea. *FEBS Journal* **273**, 2594–2606.
- Peitsch MC.** 1995. Protein modeling by E-mail. *Bio/Technology* **13**, 658–660.
- Schuller DJ, Wilks A, Ortiz de Montellano PR, Poulos TL.** 1999. Crystal structure of human heme oxygenase-1. *Nature Structural & Molecular Biology* **6**, 860–867.
- Sugishima M, Omata Y, Kakuta Y, Sakamoto H, Noguchi M, Fukuyama K.** 2000. Crystal structure of rat heme oxygenase-1 in complex with heme. *FEBS Letters* **471**, 61–66.

**Fig. S1** Cao *et al.*

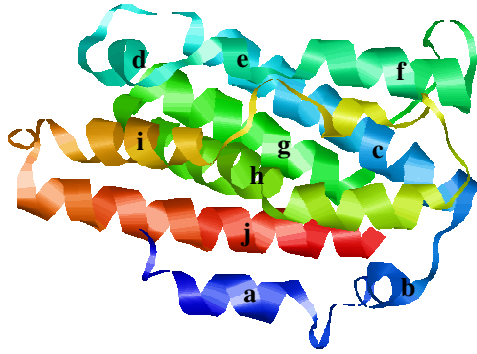

**Supplementary Figure S1.** Tertiary structure of mature BnHO1 (mBnHO1) predicted by Swiss-Model software. Letters of a to j mean the numbers of  $\alpha$ -helix from the N-terminus to the C-terminus. a: Phe20–Thr44, colored dark blue; b: Pro47–Ala53, colored blue; c: Val59–Gln82, colored light blue; d: Thr87–Phe91, colored bluish green; e: Thr94–Phe109, colored sea green; f: Ala121–Asp135, colored dark green; g: Pro138–Ser153, colored bright green; h: Arg157–Leu168, colored yellow green; i: Leu182–Lys195, colored brown; j: Arg202–Leu227, colored red.

**Fig. S2 Cao et al.**

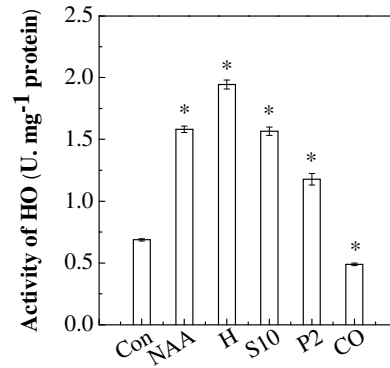

**Supplementary Figure S2.** Effects of NAA, haemin, NaCl, PEG, and CO on HO activity in rapeseed seedlings roots. Three-day-old rapeseed seedlings were treated with distilled water (Con), 100 nM NAA (NAA), 1  $\mu$ M haemin (H), 10 mM NaCl (S10), 2% PEG (P2), and 10% saturated CO aqueous solution for 6 h, respectively. Then HO activity in roots was determined. Data are the means  $\pm$  SE of at least three independent experiments. Bars with asterisks were significantly different with respect to Con at  $P < 0.05$  level according to  $t$ -test.
